# Supplementary material for: Personalized prediction of the following-day migraine attacks: a machine learning approach based on digital headache diary records
Source: Research Square preprint supplement (doi:10.21203/rs.3.rs-7226289/v1), 2025-07-31
Supplement: Supplementary file 1 [file 0d17a26a20dbdf1199085585.docx]

| | Features | Episodic Migraine (N=25) | | | --- | --- | --- | | Headache Days | 7.93 days/month | | | Severity, mean ± SD | 3.56 ± 0.99 | | | Pain location, N (%) |  |  | | Side of Head | 436 (49.2%) | | | Forehead | 150 (16.9%) | | | Eye Socket | 94 (10.6%) | | | Face | 29 (3.3%) | | | Back of Head | 177 (20%) | | | Associated Symptoms, N (%) |  |  | | Start from Side | 418 (34.2%) | | | Movement Aggravates | 158 (12.9%) | | | Requires Rest | 166 (13.5%) | | | Shoulder Stiffness | 272 (22.2%) | | | Phonophobia | 87 (7.1%) | | | Photophobia | 69 (6%) | | | Nausea | 46 (3.7%) | | | Vomit | 5 (0.4%) | | |
| --- | --- | --- | --- | --- | --- | --- | --- | --- | --- | --- | --- | --- | --- | --- | --- | --- | --- | --- | --- | --- | --- | --- | --- | --- | --- | --- | --- | --- | --- | --- | --- | --- | --- | --- | --- | --- | --- | --- | --- | --- | --- | --- | --- | --- | --- | --- | --- | --- | --- | --- | --- | --- | --- | --- |
