# Supplementary material for: Personalized prediction of the following-day migraine attacks: a machine learning approach based on digital headache diary records
Source: Research Square preprint supplement (doi:10.21203/rs.3.rs-7226289/v1), 2025-07-31
Supplement: Supplementary file 2 [file 45255f1b36616d905d9d8089.docx]

| Category | Features |
| --- | --- |
| Headache Occurrence | Morning, Afternoon, Evening, Early morning |
| Duration of Headache | Less than 4 hours, 4 to 8 hours, More than 8 hours |
| Pain Intensity Scale | 0-3 points, 4-6 points, 7-10 points |
| Pain Location | Side of the head, Forehead, Eye socket, Face, Back of the head |
| Accompanying Symptoms | No accompanying symptoms, Nausea, Vomiting, Sensitivity to light, Sensitivity to sound, Unilateral onset, Physical activity worsens, Stiff neck and shoulders, Need to rest or sleep |
| Aura | No aura, Flashing lights in vision, Partial loss of vision |
| Medication | Preventive medication, Emergency medication |
| Medication Effectiveness | Effective, Ineffective |
| Menstrual Cycle | Yes, No |
