# Supplementary material for: Personalized prediction of the following-day migraine attacks: a machine learning approach based on digital headache diary records
Source: Research Square preprint supplement (doi:10.21203/rs.3.rs-7226289/v1), 2025-07-31
Supplement: Supplementary file 3 [file 686b31870730a66ded604d61.docx]

|  |  | KNN (k=3) | SVM (Poly) | Random Forest | XGBoost |
| --- | --- | --- | --- | --- | --- |
| Accuracy | G | 0.65 | 0.65 | 0.68 | 0.65 |
| P | 0.8 ± 0.067 | 0.74 ± 0.106 | 0.77 ± 0.059 | 0.76 ± 0.053 |
| Recall | G | 0.68 | 0.53 | 0.65 | 0.65 |
| P | 0.91 ± 0.162 | 0.79 ± 0.201 | 0.79 ± 0.217 | 0.75 ± 0.226 |
| Precision | G | 0.65 | 0.70 | 0.69 | 0.64 |
| P | 0.74 ± 0.142 | 0.72 ± 0.199 | 0.76 ± 0.186 | 0.78 ± 0.206 |
| F1-score | G | 0.66 | 0.60 | 0.67 | 0.64 |
| P | 0.78 ± 0.084 | 0.72 ± 0.103 | 0.73 ± 0.088 | 0.71 ± 0.088 |
| Specificity | G | 0.63 | 0.78 | 0.72 | 0.65 |
| P | 0.7 ± 0.182 | 0.72 ± 0.202 | 0.77 ± 0.184 | 0.77 ± 0.233 |
| AUC | G | 0.70 | 0.69 | 0.72 | 0.69 |
| P | 0.83 ± 0.099 | 0.72 ± 0.153 | 0.81 ± 0.16 | 0.75 ± 0.168 |

Abbreviations: AUC = Area Under Curve; KNN = K Nearest Neighbor; SVM = support vector machine; SD = standard deviation; G=Generalized; P=Personalized.
