# Supplementary material for: Personalized prediction of the following-day migraine attacks: a machine learning approach based on digital headache diary records
Source: Research Square preprint supplement (doi:10.21203/rs.3.rs-7226289/v1), 2025-07-31
Supplement: Supplementary file 4 [file b807ecf973d0895d70908f7e.docx]

| | Variables |  | Episodic Migraine (N=25) | | --- | --- | --- | | Gender | Male | 5 (20%) | |  | Female | 20 (80%) | | Age | 21-30 | 3 (12%) | |  | 31-40 | 4 (16%) | |  | 41-50 | 13 (52%) | |  | 51-60 | 5 (20%) | | Education Status | High School or below | 8 (32%) | |  | Vocational College | 3 (12%) | |  | Bachelor’s Degree | 13 (52%) | |  | Graduate School or above | 1 (4%) | | MIDAS | Little or No Disability | 7 (28%) | |  | Mild Disability | 2 (8%) | |  | Moderate Disability | 8 (32%) | |  | Severe Disability | 8 (32%) | | Occupation | Yes | 22 (88%) | |  | No | 3 (12%) | | 1st visit | Yes | 4 (16%) | |  | No | 21 (84%) | |
| --- | --- | --- | --- | --- | --- | --- | --- | --- | --- | --- | --- | --- | --- | --- | --- | --- | --- | --- | --- | --- | --- | --- | --- | --- | --- | --- | --- | --- | --- | --- | --- | --- | --- | --- | --- | --- | --- | --- | --- | --- | --- | --- | --- | --- | --- | --- | --- | --- | --- | --- | --- | --- | --- | --- | --- | --- | --- |

Abbreviations: MIDAS = Migraine Disability Assessment
